# Supplementary material for: Mycobacterium tuberculosis-specific CD4+ and CD8+ T cells differ in their capacity to recognize infected macrophages
Source: PubMed Central journal article supplement (PMC6013218; doi:10.1371/journal.ppat.1007060), 2018-05-21

A.

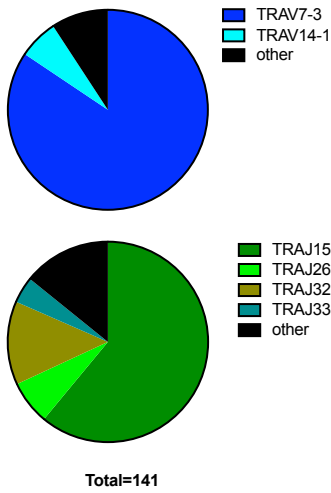

B.

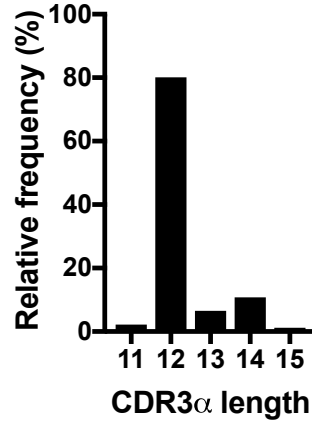

C.

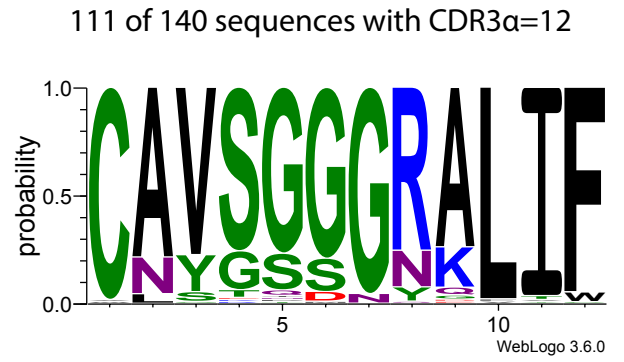

D.

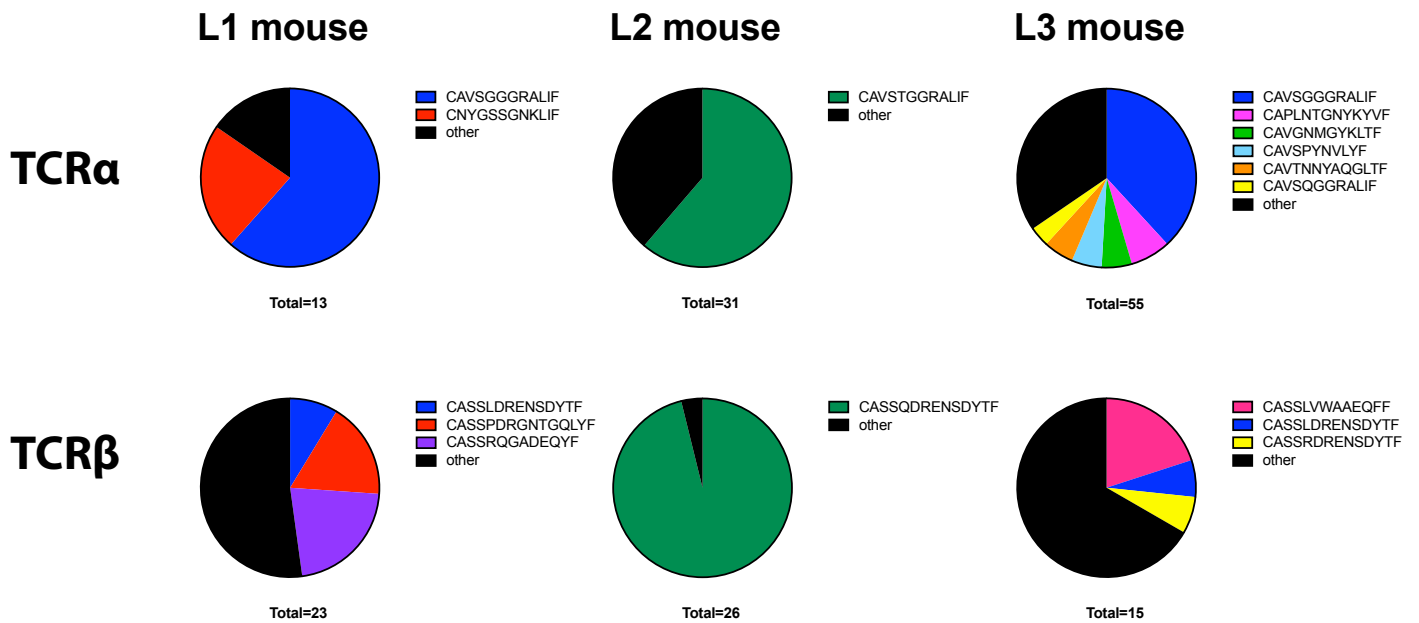

E.

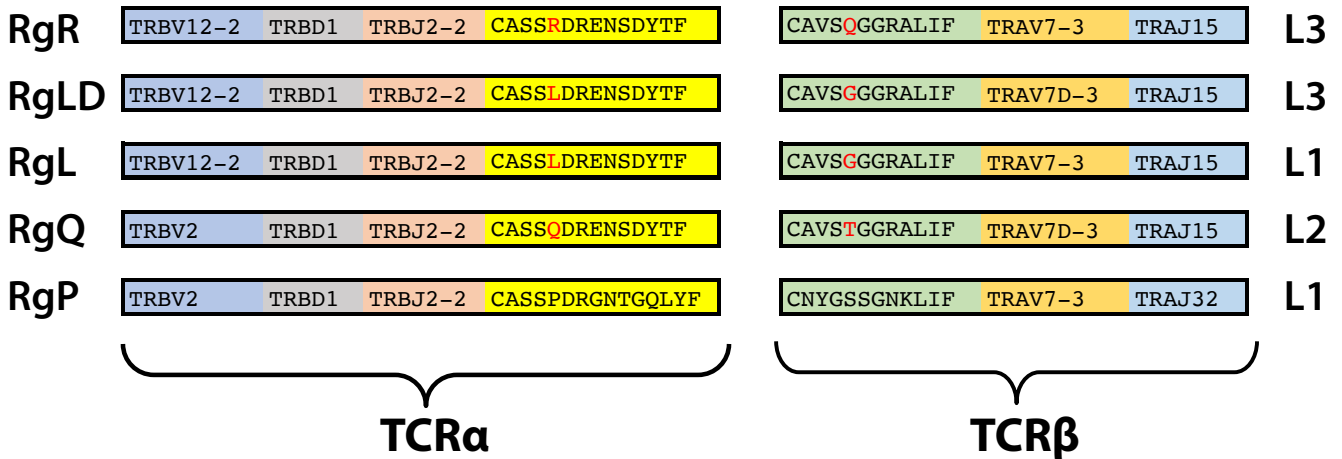

Supplement: ppat.1007060.s002.pdf [file ppat.1007060.s002.pdf]
