# Supplementary material for: Mycobacterium tuberculosis-specific CD4+ and CD8+ T cells differ in their capacity to recognize infected macrophages
Source: PubMed Central journal article supplement (PMC6013218; doi:10.1371/journal.ppat.1007060), 2018-05-21

S4 Fig

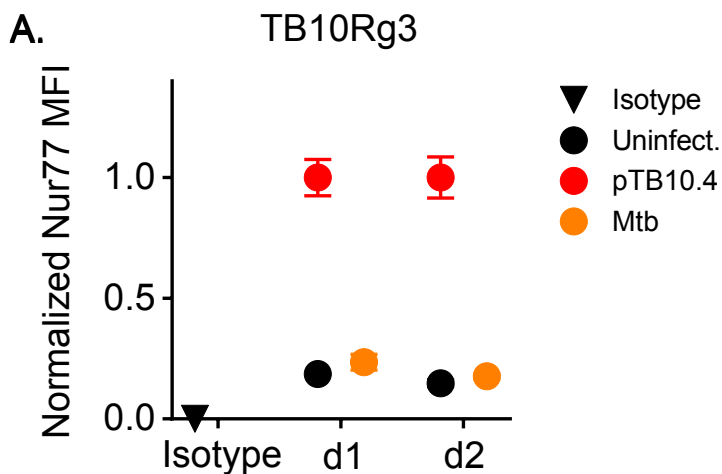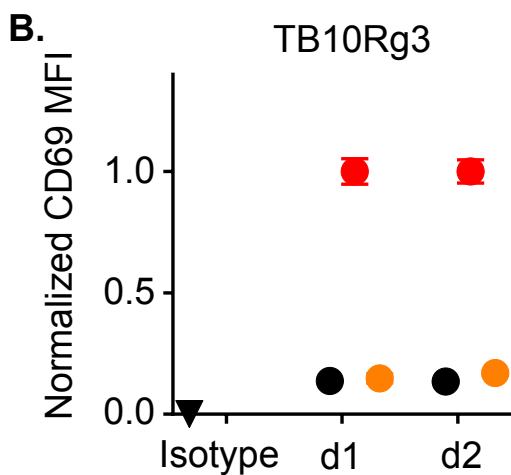

Supplement: ppat.1007060.s004.pdf [file ppat.1007060.s004.pdf]
